# Supplementary material
Source: Springer Nature journal article supplement (https://www.springermedizin.de/resource/supplementary/12936_2014_3337_MOESM4_ESM.pdf/9545690)

# Kaplan Meier failure graph (to negative)

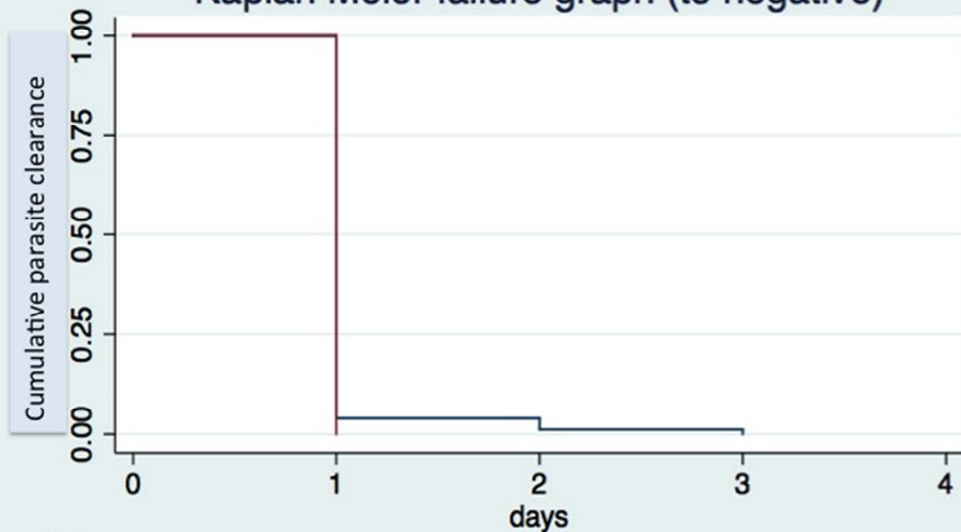

Number at risk

|              | 0   | 1   | 2  | 3 | 4 |
|--------------|-----|-----|----|---|---|
| grup = AL    | 425 | 425 | 17 | 5 | 0 |
| grup = AQ-AS | 254 | 254 | 0  | 0 | 0 |

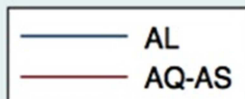

Supplement: MOESM4 [file 9545690]
